# Supplementary material for: CoOx nanoparticle anchored on sulfonated-graphite as efficient water oxidation catalyst
Source: Royal Society of Chemistry journal article supplement (doi:10.1039/c7sc01756a), 2017-01-01
Supplement: c7sc01756a1.pdf [file c7sc01756a1.pdf]

## Supporting Information

### **CoO<sub>x</sub> Nanoparticle Anchored on Sulfonated-graphite as Efficient Water**

### **Oxidation Catalyst**

Jingqi Guan, Chunmei Ding, Ruotian Chen, Baokun Huang, Xianwen Zhang, Fengtao Fan, Fuxiang Zhang\* and Can Li\*

State Key Laboratory of Catalysis, *iChEM*, Dalian Institute of Chemical Physics, Chinese Academy of Sciences, Dalian National Laboratory for Clean Energy, Dalian, 116023, China. E-mail: fxzhang@dicp.ac.cn; canli@dicp.ac.cn

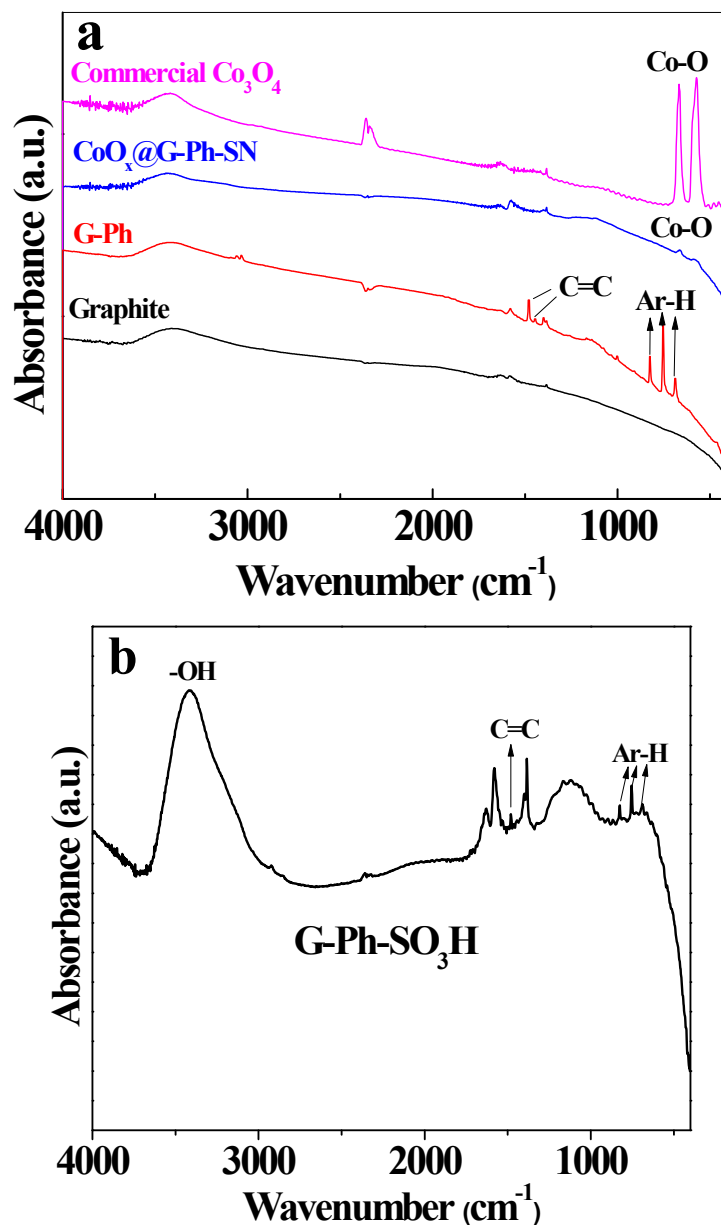

**Fig. S1.** FTIR spectra of (a) graphite, G-Ph,  $\text{CoO}_x@G\text{-Ph-SN}$ , and commercial  $\text{Co}_3\text{O}_4$  and (b) G-Ph- $\text{SO}_3\text{H}$ .

From Fig. S1a, the peaks at 687, 753 and 832  $\text{cm}^{-1}$  assigned to the Ar-H vibrations, and peaks at 1455 and 1480  $\text{cm}^{-1}$  due to the C=C vibrations can be clearly seen for the G-Ph sample, suggesting the successfully anchoring of phenyl on the surface of graphite. After further surface sulfonation, the peaks at 687, 753, 832, and

1480  $\text{cm}^{-1}$  assigned to the Ar-H and C=C vibrations of phenyl groups for G-Ph-SO<sub>3</sub>H can be still seen (Fig. S1b), although the intensities of these peaks are decreased. This demonstrates that part of phenyl groups fell off during the sulfonation process. However, it should be pointed out that the content of the sulfur element analyzed by XPS (see Table S1) is as large as 0.4 mol%, demonstrating the amount of phenylsulfonic groups on the surface of graphite is still large. After the hydrothermal treatment, the bands (571 and 674  $\text{cm}^{-1}$ ) related to Co-O bonds can be found, suggesting that the CoO<sub>x</sub> nanoparticles have been well supported on the surface of functionalized graphite (G-Ph-SO<sub>3</sub>H).

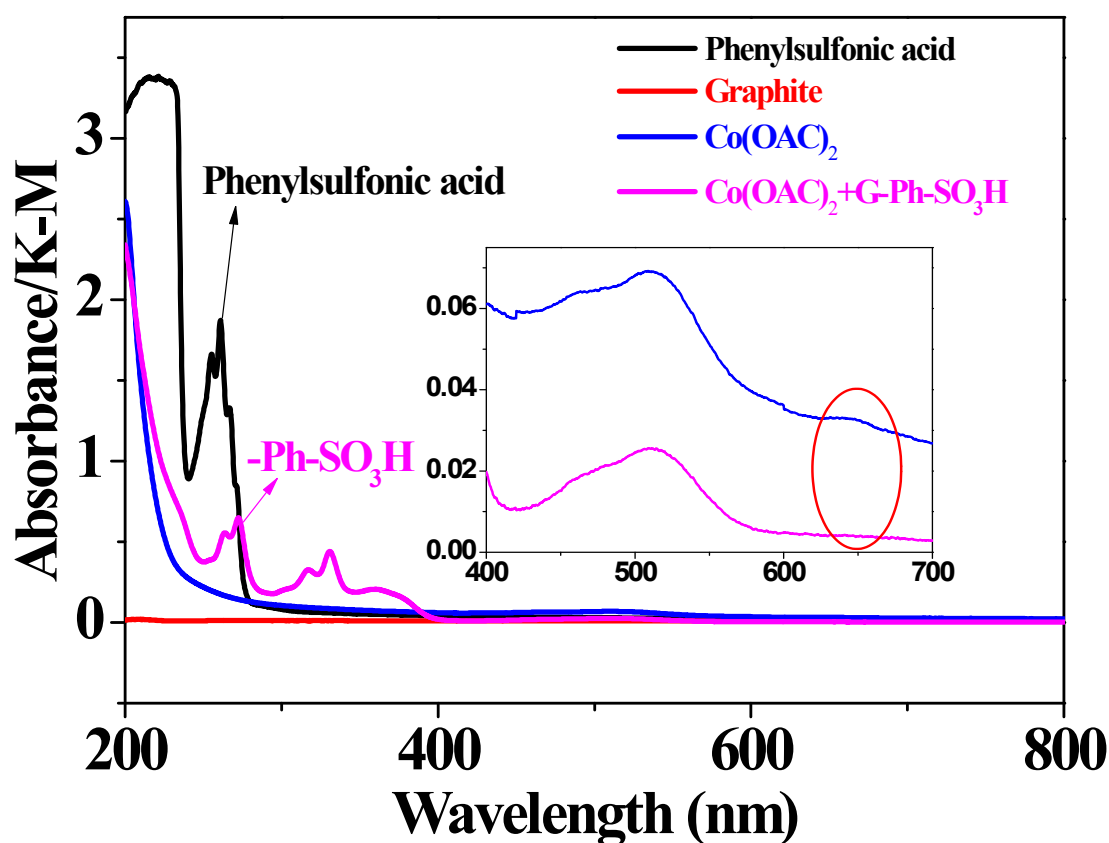

Fig. S2. UV/Vis diffuse reflectance spectra of various solutions: 100 mM phenylsulfonic acid (black), graphite (red), 5 mM cobaltous acetate (blue), and the mixture of 5 mM cobaltous acetate and G-Ph-SO<sub>3</sub>H (pink).

From Fig. S2, the main UV-Vis absorption peak of the benzenesulfonate group shifts from 262 nm to 273 nm after anchoring it onto the surface of graphite, indicating the success of the synthesis. In addition, the UV-Vis absorption peak corresponding to the cobaltous acetate centred at ca. 644 nm disappears after adding G-Ph-SO<sub>3</sub>H to the solution of cobaltous acetate, suggesting the possible formation of cobalt benzenesulfonate intermediate as further confirmed by the followed Fig. S3.

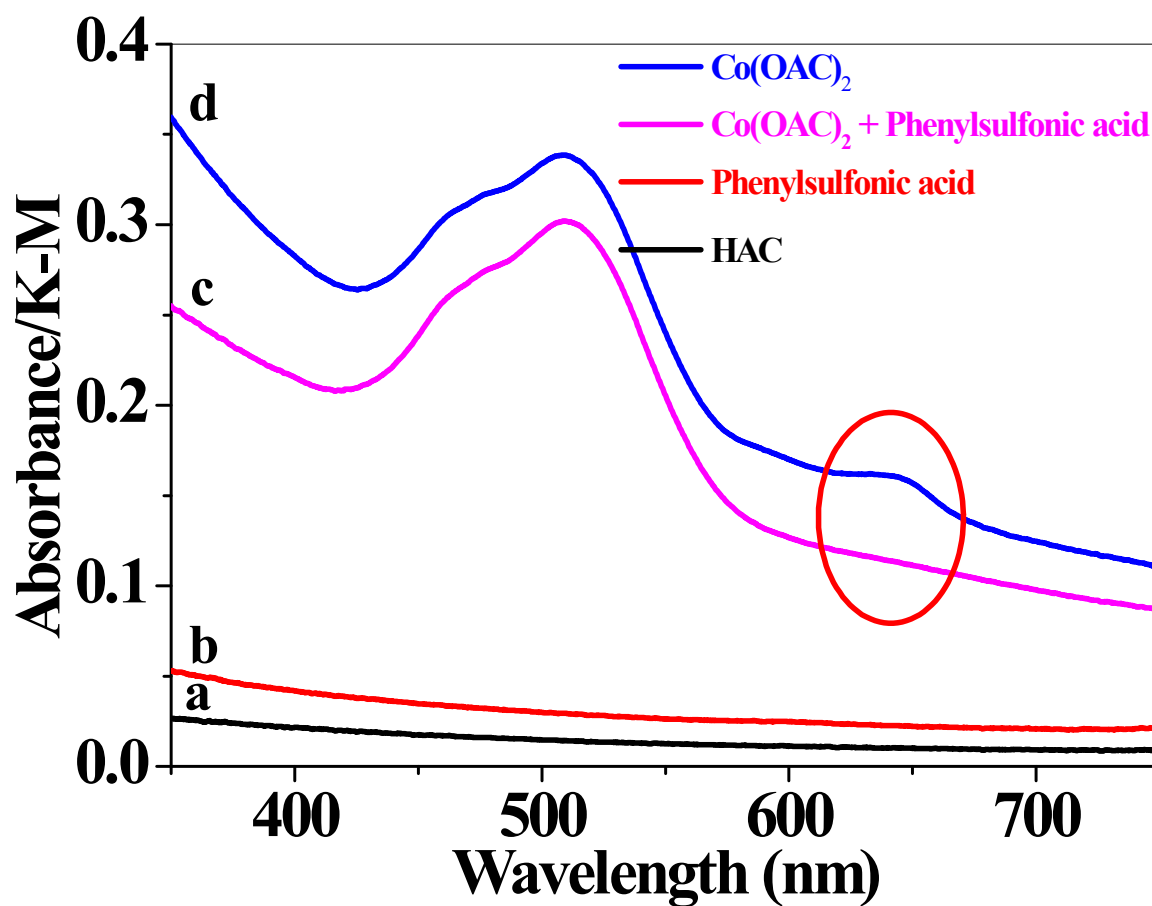

Fig. S3. UV/Vis diffuse reflectance spectra of various solutions: (a) 50 mM acetic acid, (b) 50 mM phenylsulfonic acid, (c) the isometric mixture of 50 mM cobaltous acetate and 100 mM phenylsulfonic acid, and (d) 25 mM cobaltous acetate.

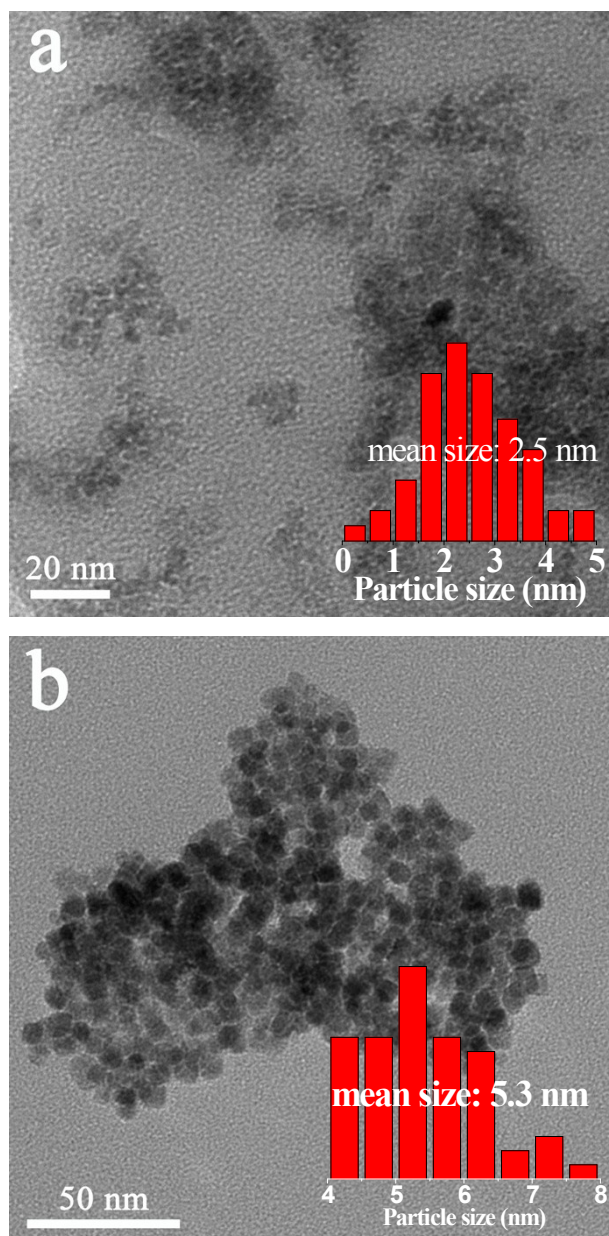

**Fig. S4.** TEM images and histogram of size distributions of  $\text{CoO}_x@\text{G-O}$  (a) and  $\text{Co}_3\text{O}_4\text{-nano}$  (b).

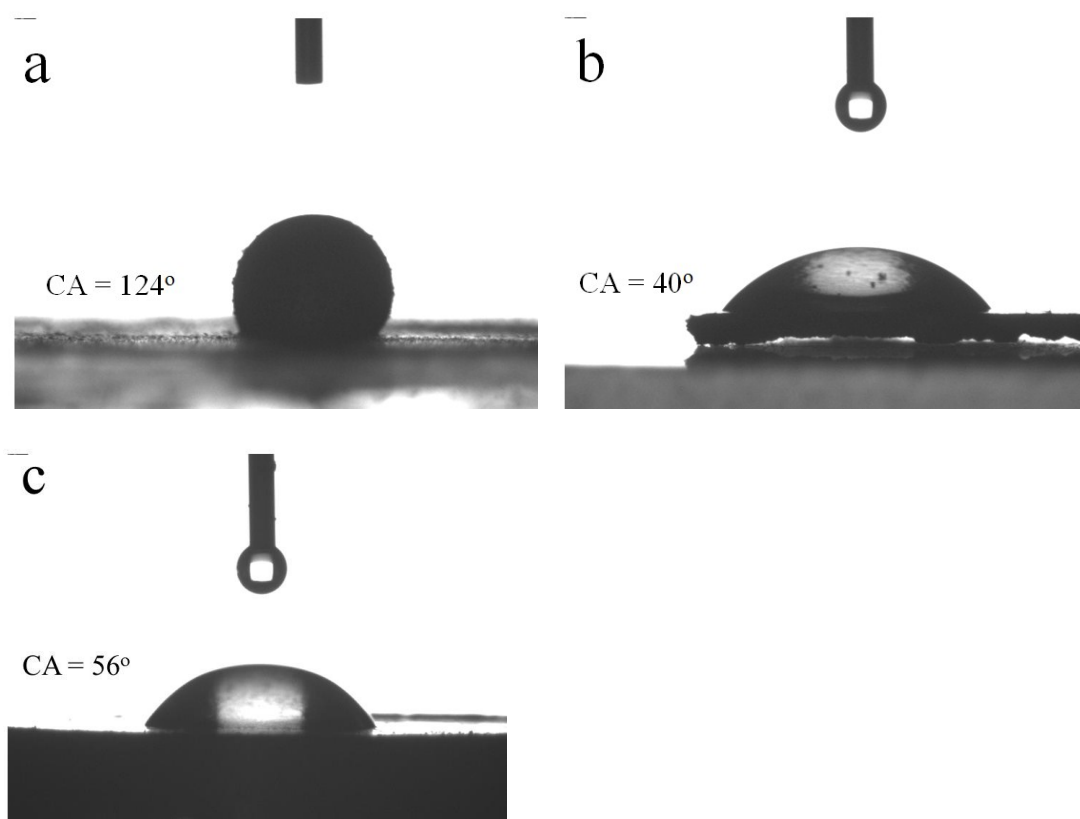

**Fig. S5.** Contact angles (CAs) of (a) graphite, (b) G-Ph-SO<sub>3</sub>H and (c) G-O.

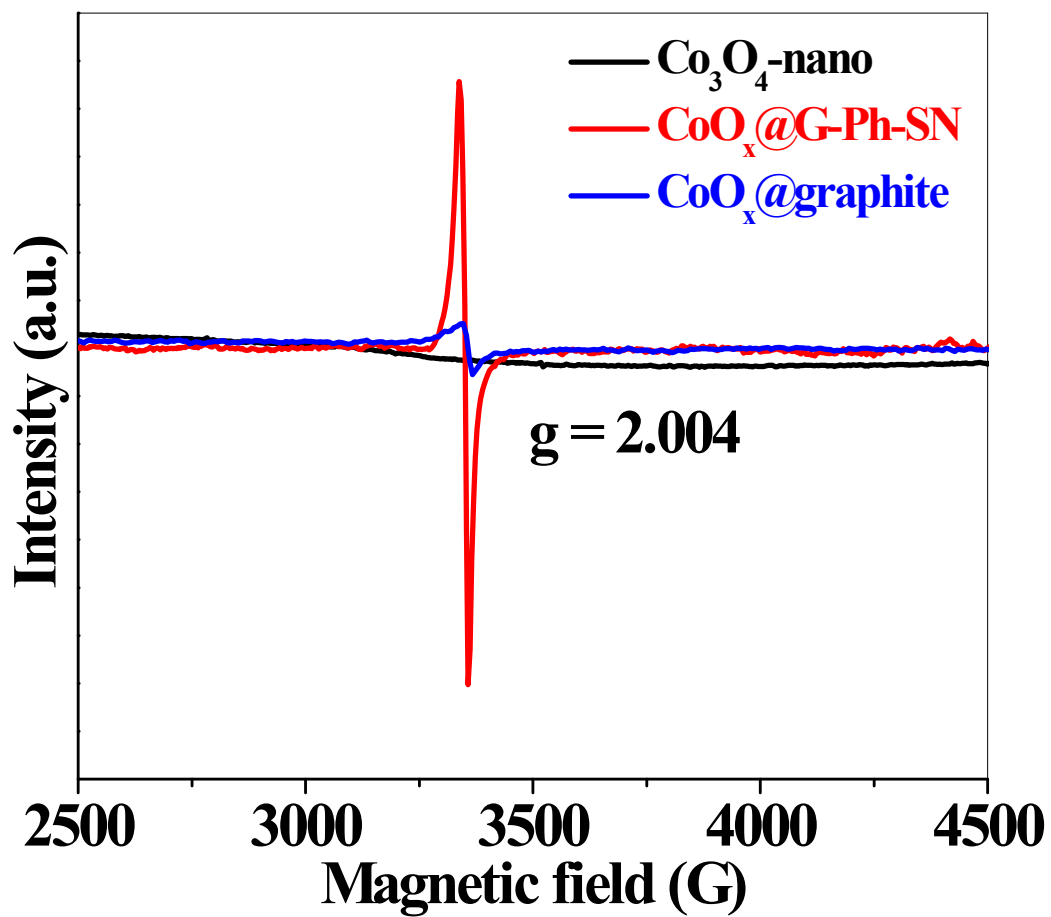

Fig. S6. EPR spectra of  $\text{Co}_3\text{O}_4\text{-nano}$ ,  $\text{CoO}_x\text{@graphite}$ , and  $\text{CoO}_x\text{@G-Ph-SN}$ .



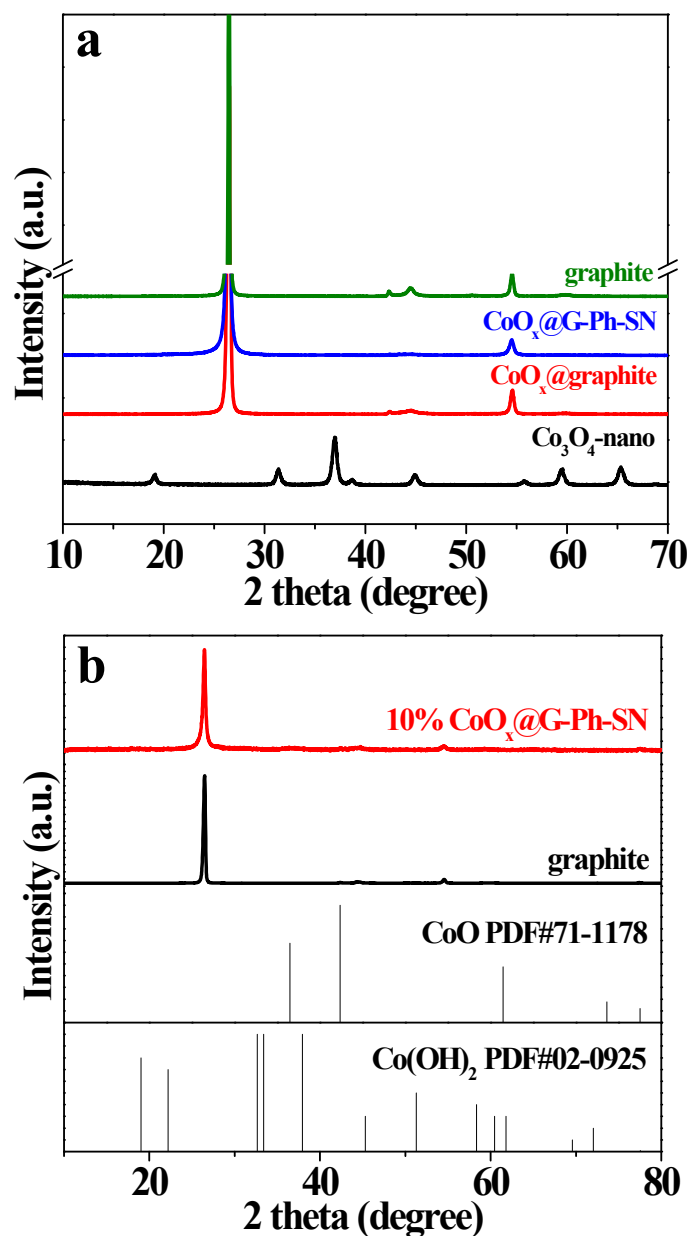

**Fig. S7.** XRD patterns of (a) graphite, CoO<sub>x</sub>@G-Ph-SN, CoO<sub>x</sub>@graphite and Co<sub>3</sub>O<sub>4</sub>-nano; and (b) graphite, 10% CoO<sub>x</sub>@G-Ph-SN, CoO and Co(OH)<sub>2</sub>.

10% CoO<sub>x</sub>@G-Ph-SN was similarly synthesized by following the hydrothermal process of CoO<sub>x</sub>@G-Ph-SN except that the initial Co(CH<sub>3</sub>COO)<sub>2</sub>•4H<sub>2</sub>O amount increased to 132 mg and the added ammonia amount increased to 750 μL.

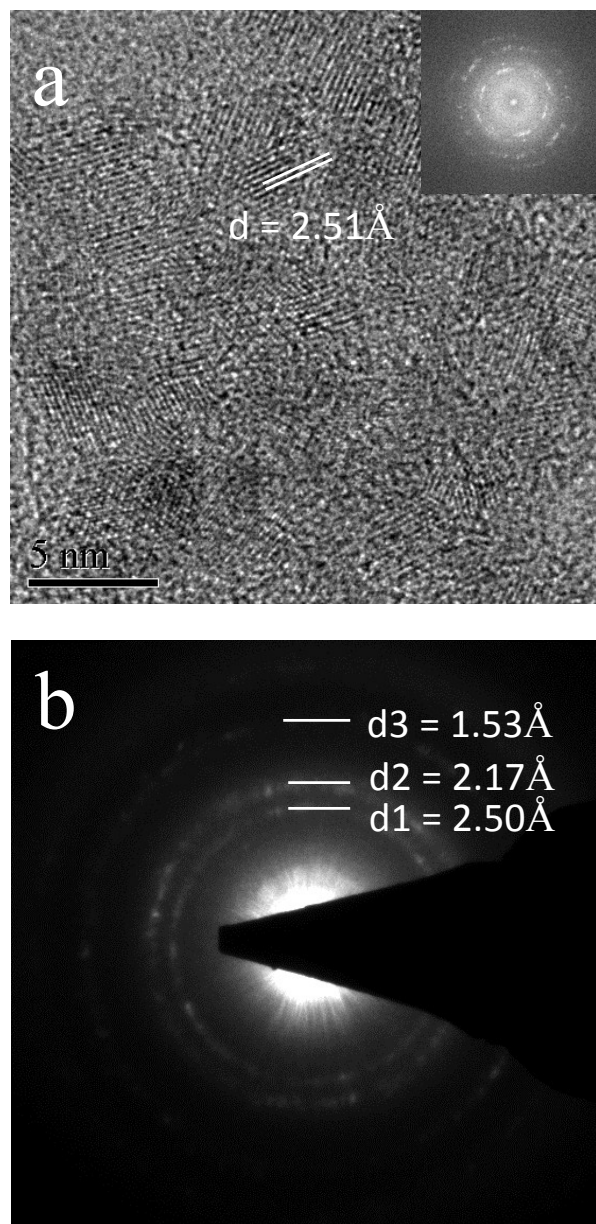

**Fig. S8.** HRTEM image of  $\text{CoO}_x@\text{G-Ph-SN}$  (a) and SAED pattern of  $\text{CoO}_x$  (b).

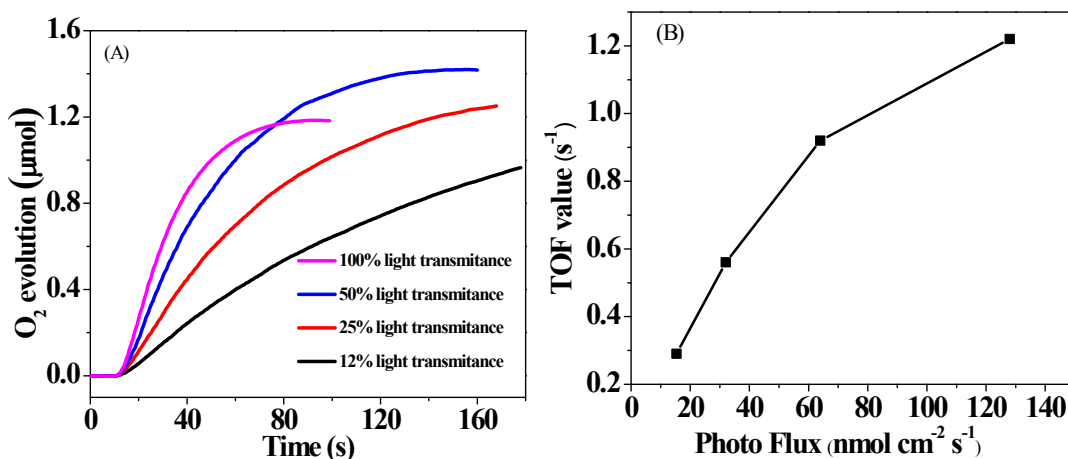

**Fig. S9.** Investigation of TOF value as a function of photo flux: (A) Time course of O<sub>2</sub> evolution; (B) Dependence of TOF value as the photo flux.

Reaction conditions: 0.15 mg catalyst, 3 mL H<sub>2</sub>O, [Ru<sup>II</sup>(bpy)<sub>3</sub>]Cl<sub>2</sub> (1.0 mM), and Na<sub>2</sub>S<sub>2</sub>O<sub>8</sub> (5.0 mM) in borate buffer (80 mM, pH 9). As for the 100% light transmittance, the photo flux is  $1.28 \times 10^{-7}$  mol cm<sup>-2</sup> s<sup>-1</sup>, which was measured by an EKO LS-100 spectroradiometer. The light intensity was controlled by using neutral density filter (ZND0012, ZND0025 and ZND0050), which can keep spectrally even performance in VIS range.

*As seen in Fig. S9, the TOF value is first linearly increased and then slowly increased with the increasing light intensity. The TOF value reaches a maximum under the 100% light transmittance and can not be increased even by using higher intensity light source to irradiate (e.g. 300 W xenon). It should be noted that the Ru(bpy)<sub>3</sub><sup>2+</sup> is not stable under very strong light irradiation (e.g. 300 W xenon).*

**Table S1** Surface elemental contents of CoO<sub>x</sub>@graphite, CoO<sub>x</sub>@G-O and CoO<sub>x</sub>@G-Ph-SN analyzed by XPS

| Catalysts                  | Surface composition ( <i>mol.%</i> ) |     |     |     |     |
|----------------------------|--------------------------------------|-----|-----|-----|-----|
|                            | C                                    | O   | N   | S   | Co  |
| CoO <sub>x</sub> @graphite | 96.8                                 | 2.9 | -   | -   | 0.3 |
| CoO <sub>x</sub> @G-O      | 93.1                                 | 6.4 | 0.1 | 0.1 | 0.3 |
| CoO <sub>x</sub> @G-Ph-SN  | 95.5                                 | 3.4 | 0.4 | 0.4 | 0.3 |

**Table S2** Comparison of the catalytic performance of various Co-based water oxidation catalysts

| Catalysts                                                          | Oxidant                            | TOF (s <sup>-1</sup> ) | References |
|--------------------------------------------------------------------|------------------------------------|------------------------|------------|
| CoO <sub>x</sub> @G-Ph-SN (~1.6 nm)                                | Ru(bpy) <sub>3</sub> <sup>3+</sup> | 1.2                    | This work  |
| Co <sub>3</sub> O <sub>4</sub>                                     | Ru(bpy) <sub>3</sub> <sup>3+</sup> | 1.4*10 <sup>-4</sup>   | 1          |
| Nano Co <sub>3</sub> O <sub>4</sub> (~ 6 nm)                       | Ru(bpy) <sub>3</sub> <sup>3+</sup> | 2.5*10 <sup>-4</sup>   | 2          |
| SBA-15/Co <sub>3</sub> O <sub>4</sub>                              | Ru(bpy) <sub>3</sub> <sup>3+</sup> | 3.4*10 <sup>-4</sup>   | 2          |
| SBA-15/Co <sub>3</sub> O <sub>4</sub>                              | Ce(IV)                             | 6.4*10 <sup>-4</sup>   | 3          |
| Mesoporous Co <sub>3</sub> O <sub>4</sub>                          | Ce(IV)                             | ~2.2*10 <sup>-3</sup>  | 4          |
| Mesoporous Mg–Co <sub>3</sub> O <sub>4</sub>                       | Ce(IV)                             | 1*10 <sup>-3</sup>     | 4          |
| Co <sub>3</sub> O <sub>4</sub> /mesoporous silica                  | Ce(IV)                             | ~4*10 <sup>-4</sup>    | 4          |
| ZnCo <sub>1.0</sub> O <sub>y</sub>                                 | Ru(bpy) <sub>3</sub> <sup>3+</sup> | 3.2*10 <sup>-3</sup>   | 5          |
| Co <sub>4</sub> O <sub>4</sub> (py) <sub>4</sub> (Ac) <sub>4</sub> | Ru(bpy) <sub>3</sub> <sup>3+</sup> | 0.02                   | 6          |

## References

1. A. Harriman, I. J. Pickering, J. M. Thomas and P. A. Christensen, *J. Chem. Soc., Faraday Trans.*, 1988, **84**, 2795.
2. S. Yusuf and F. Jiao, *ACS Catal.*, 2012, **2**, 2753.
3. F. Jiao and H. Frei, *Angew. Chem. Int. Ed.*, 2009, **48**, 1841.
4. J. Rosen, G. S. Hutchings and F. Jiao, *J. Am. Chem. Soc.*, 2013, **135**, 4516.
5. F. Rong, J. Zhao, P. Su, Y. Yao, M. Li, Q. Yang and C. Li, *J. Mater. Chem. A*, 2015, **3**, 4010.
6. N. S. McCool, D. M. Robinson, J. E. Sheats and G. C. Dismukes, *J. Am. Chem. Soc.*, 2011, **133**, 11446.
